# Supplementary material for: Heightened Local Th17 Cell Inflammation Is Associated with Severe Community‐Acquired Pneumonia in Children under the Age of 1 Year
Source: Hindawi journal article supplement (doi:10.1155/2021/9955168), 2021-01-01

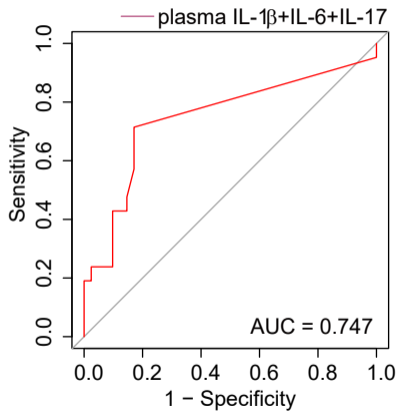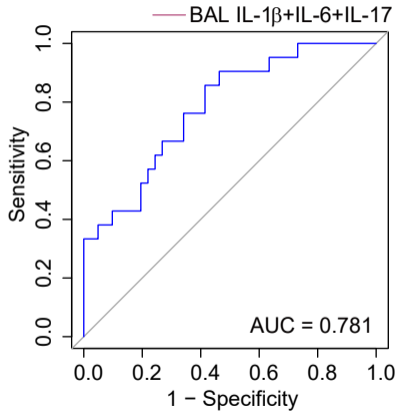

Supplement: f1 [file 9955168.f1.pdf]
